# Supplementary material for: Metal–organic framework tethering PNIPAM for ON–OFF controlled release in solution
Source: Royal Society of Chemistry journal article supplement (doi:10.1039/c5cc02339d), 2015-01-01
Supplement: c5cc02339d1.pdf [file c5cc02339d1.pdf]

## Electronic Supplementary Information

### **Metal-Organic Framework Tethering PNIPAM for ON-OFF Controlled Release in Solution**

*Shunjiro Nagata, Kenta Kokado\*, Kazuki Sada\**

#### **Table of Contents**

|                                                                                                                                                                   |       |
|-------------------------------------------------------------------------------------------------------------------------------------------------------------------|-------|
| <b>Experimental section</b>                                                                                                                                       | S2-S3 |
| <b>Fig. S1</b> Thermoresponsiveness of PNIPAM-NHS                                                                                                                 | S4    |
| <b>Fig. S2</b> DLS histogram of <b>UiO-66-PNIPAM</b>                                                                                                              | S4    |
| <b>Fig. S3</b> XRD patterns of UiO-66, <b>UiO-66-NH<sub>2</sub></b> , and <b>UiO-66-PNIPAM</b>                                                                    | S5    |
| <b>Fig. S4</b> FT-IR spectra of <b>UiO-66-NH<sub>2</sub></b> , and <b>UiO-66-PNIPAM</b>                                                                           | S5    |
| <b>Fig. S5</b> <sup>1</sup> H NMR spectra change upon acetylation of <b>UiO-66-NH<sub>2</sub></b> and <b>UiO-66-PNIPAM</b>                                        | S6    |
| <b>Fig. S6</b> Time-course UV-Vis spectra upon release of resorufin from <b>UiO-66-PNIPAM</b> at 25 °C and 40 °C                                                  | S6    |
| <b>Fig. S7</b> Release behavior of resorufin from pristine <b>UiO-66-NH<sub>2</sub></b> and <b>UiO-66-PNIPAM</b>                                                  | S7    |
| <b>Fig. S8</b> <sup>1</sup> H NMR spectra of digesting solution of <b>UiO-66-PNIPAM</b> treated with resorufin water solution                                     | S7    |
| <b>Fig. S9</b> Release behavior of resorufin from <b>UiO-66-PNIPAM</b> and <b>UiO-66-PNIPAM(4.2)</b>                                                              | S8    |
| <b>Fig. S10</b> <sup>1</sup> H NMR spectra of digesting solution of <b>UiO-66-NH<sub>2</sub></b> and <b>UiO-66-PNIPAM</b> treated with <b>PPIX</b> water solution | S8    |
| <b>Fig. S11</b> Release behavior of resorufin from reloaded <b>UiO-66-PNIPAM</b> until 3 times at 25 °C and 40 °C                                                 | S9    |

## Experimental Section

### Materials

All reagents were obtained from commercial sources and used without further purification.

PNIPAM-NHS ( $M_n \sim 2,000$ ) were purchased from Sigma-Aldrich.

**Measurements.**  $^1\text{H}$  (500 MHz) NMR measurements were recorded on a Bruker Biospin AVANCE DRX500 instrument, using 0.05% tetramethylsilane (TMS) as an internal standard. Size exclusion chromatography (SEC) at room temperature was carried out on a SHIMADZU LC-9A system (SHODEX KD-805 column) with a SPD-10AVP UV-Vis Detector using chloroform as an eluent, after calibration with the standard polystyrene samples. UV-Vis spectra and turbidity were recorded on a JASCO V-570 spectrophotometer with a JASCO ETC-50ST temperature controller. Powder X-ray diffraction (XRD) patterns were obtained by Bruker AXS D8 ADVANCE. Scanning electron microscope (SEM) images were obtained by using a JEOL JSM-7400F. Transmitting electron microscope (TEM) images were acquired by using a JEOL JEM-2100F. Fourier transform infrared (FTIR) spectra were observed with a JASCO FTIR-4100 SK spectrometer with a ZnSe prism kit PKS-ZNSE for ATR technique. Dynamic light scattering (DLS) measurement was conducted by a Beckman-Coulter Delsa Nano HC.

### Synthesis of UiO-66-NH<sub>2</sub>

In an autoclave vial, 2-amino-benzenedicarboxylic acid (11 mg, 61  $\mu\text{mol}$ ),  $\text{ZrCl}_4$  (12 mg, 52  $\mu\text{mol}$ ), and benzoic acid (190 mg, 1.6 mmol) were dissolved in DMF (1 mL), and the mixture was kept still standing at 120 °C for 24 h. After cooling to room temperature, the crystal was collected by centrifuging (2,000 rpm, 3 min), with repeating wash by DMF and methanol.

### **Synthesis of UiO-66-PNIPAM**

In a 5mL screw vial, **UiO-66-NH<sub>2</sub>** (60 mg) and 0.1 M PNIPAM-NHS solution (500  $\mu$ L) in chloroform were mixed, and the mixture was kept still standing at 60 °C for 24 h. After cooling to room temperature, the crystals were collected by filtration and repeatedly washed by chloroform and methanol. The modification rate was determined by <sup>1</sup>H NMR after digestion of the crystal by HF aq.

### **Modification of UiO-66-NH<sub>2</sub> by acetic anhydride**

In a 5mL screw vial, **UiO-66-NH<sub>2</sub>** (10 mg) and 0.4 M acetic anhydride solution (2 mL) in chloroform were mixed, and the mixture was kept still standing at 60 °C for 48 h. After cooling to room temperature, the crystals were collected by centrifuging (10,000 rpm, 5 min), and immersed in chloroform for 3 days to remove the residual acetic anhydride. Finally, the crystal was collected by centrifuging (10,000 rpm, 5 min). The modification rate was determined by <sup>1</sup>H NMR after digestion of the crystal by HF aq.

### **Guest loading of UiO-66-PNIPAM**

In a 5mL screw vial, **UiO-66-PNIPAM** (10 mg) was immersed in 50 mM guest solution (1 mL), and it was kept standing at 25 °C for 24 h. The crystal was collected by centrifuging (10,000 rpm, 40 °C, 5 min) and washed by water, and this cycle was repeated 10 times. The amount of whole guest was determined by <sup>1</sup>H NMR after digestion of the crystal by HF aq.

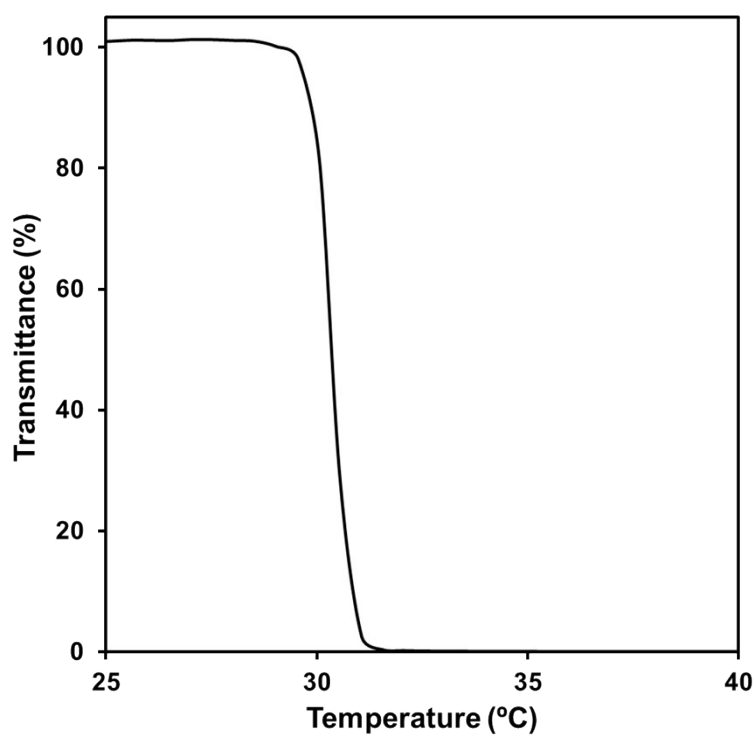

**Fig. S1** Thermoresponsiveness of PNIPAM-NHS (15 g/L in water).

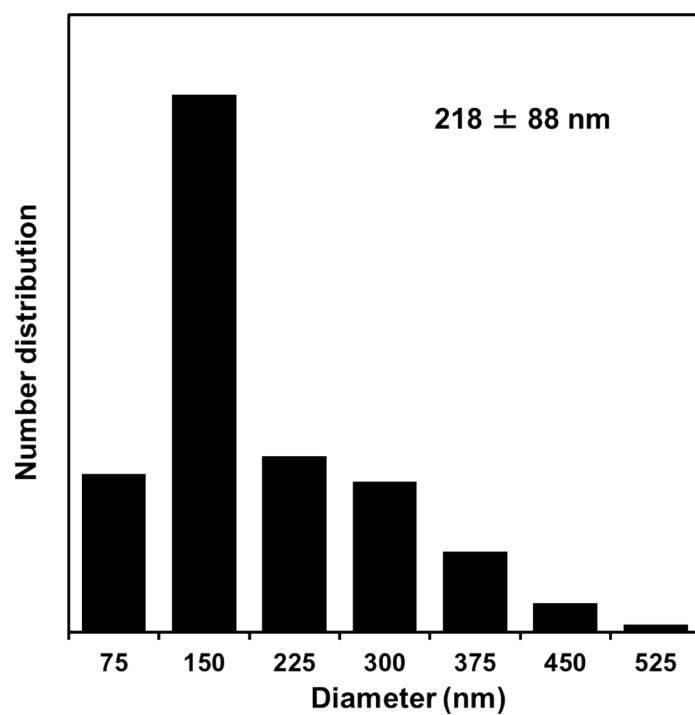

**Fig. S2** DLS histogram of UiO-66-PNIPAM.

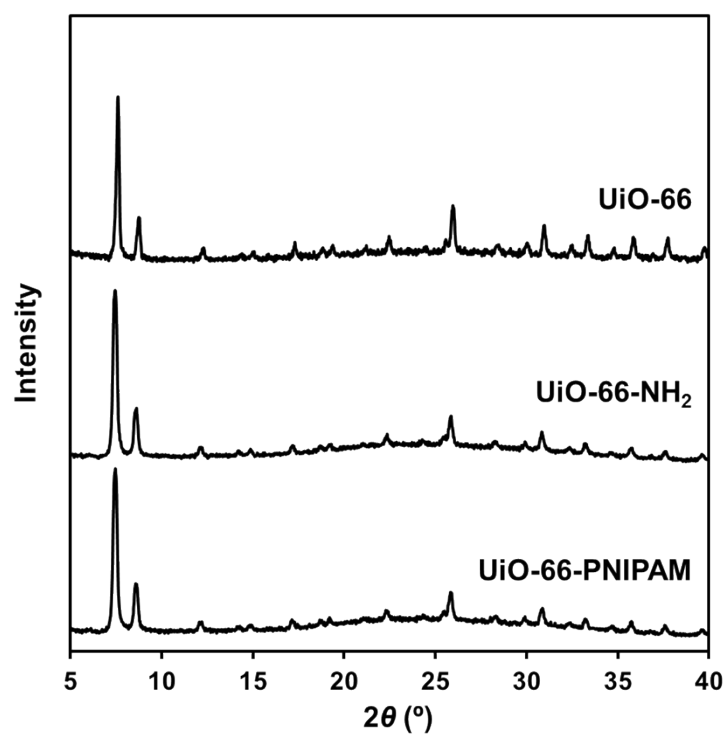

**Fig. S3** XRD patterns of UiO-66, UiO-66-NH<sub>2</sub>, and UiO-66-PNIPAM.

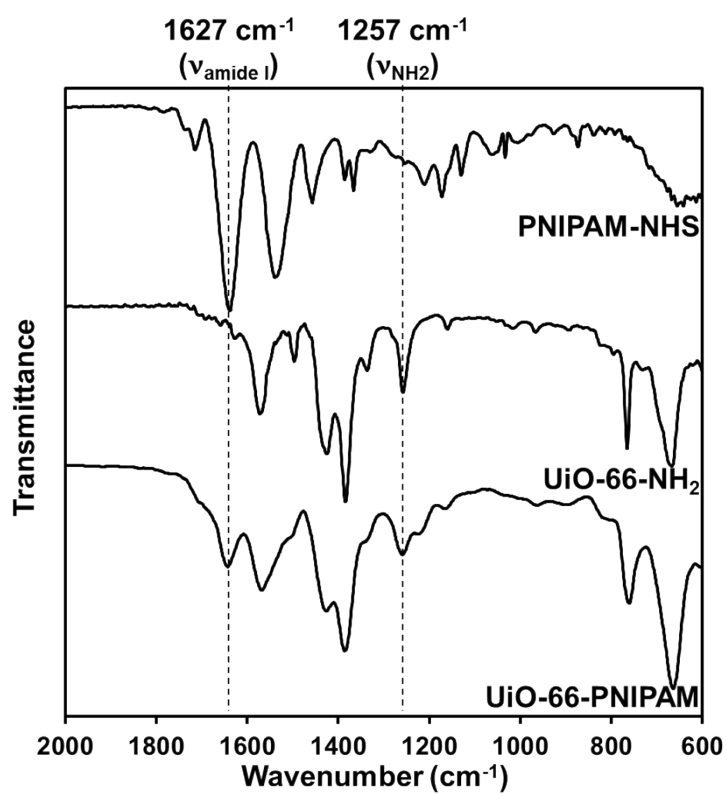

**Fig. S4** FT-IR spectra of UiO-66-NH<sub>2</sub>, and UiO-66-PNIPAM.

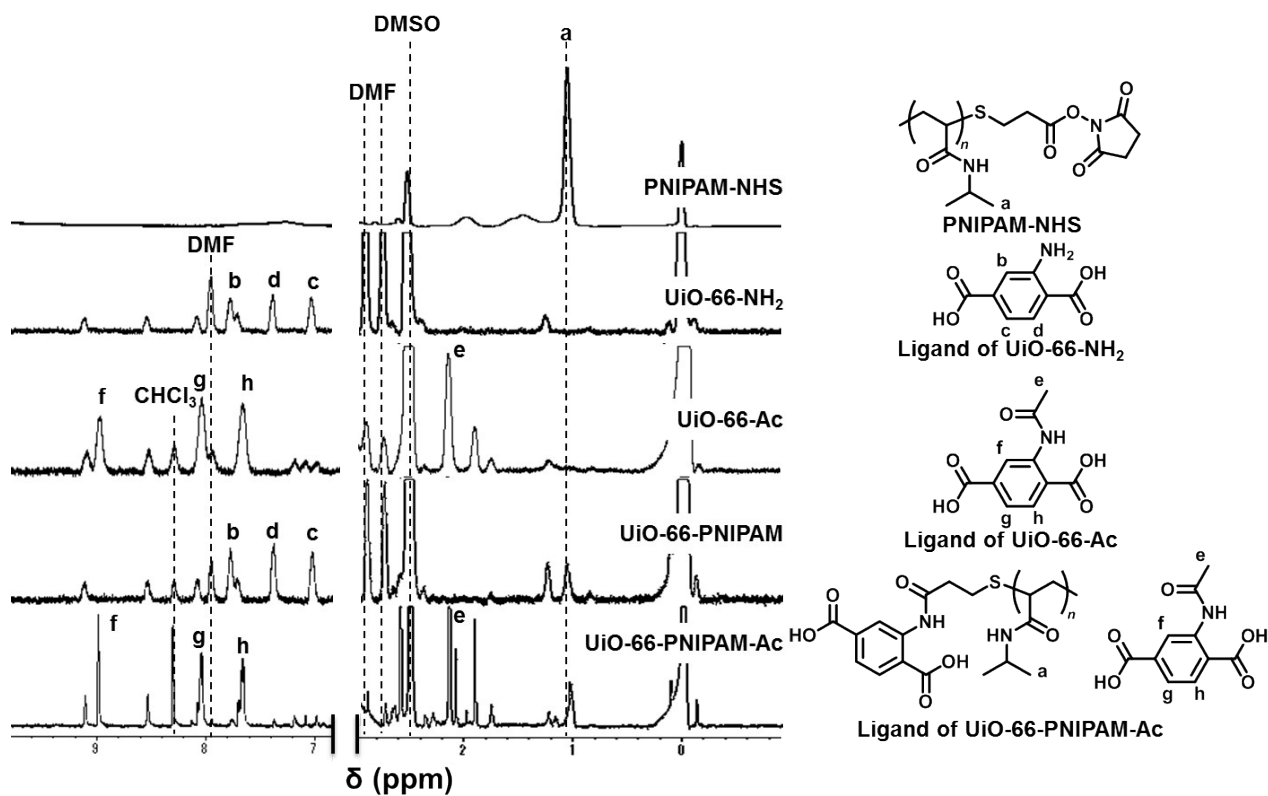

**Fig. S5**  $^1\text{H}$  NMR spectra change upon acetylation of  $\text{UiO-66-NH}_2$  and  $\text{UiO-66-PNIPAM}$ .

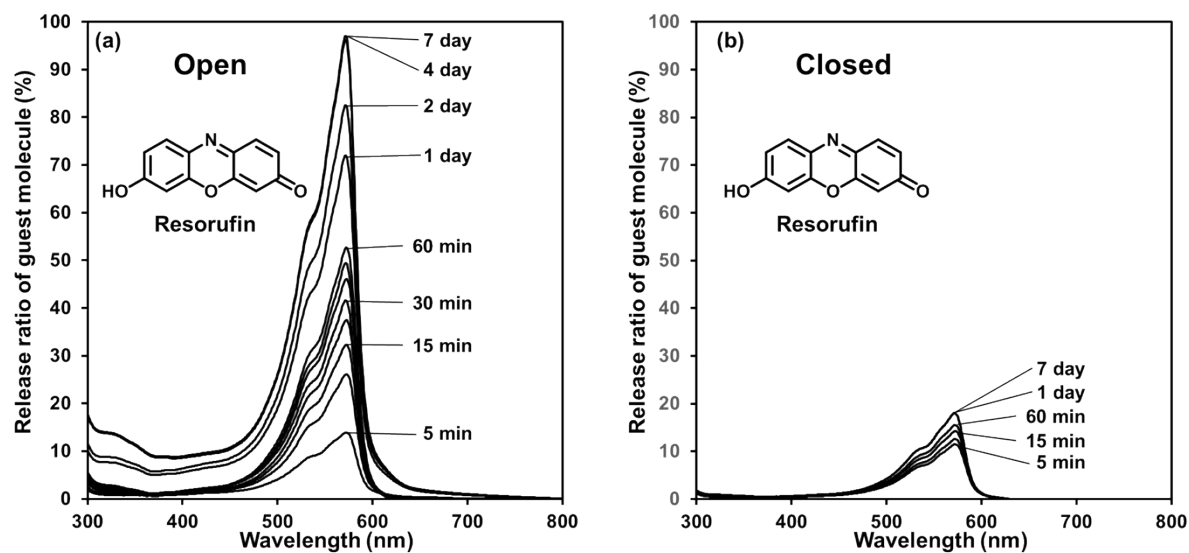

**Fig. S6** Time-course UV-Vis spectra upon release of resorufin from  $\text{UiO-66-PNIPAM}$  in (a) open state (25 °C) and (b) closed state (40 °C).

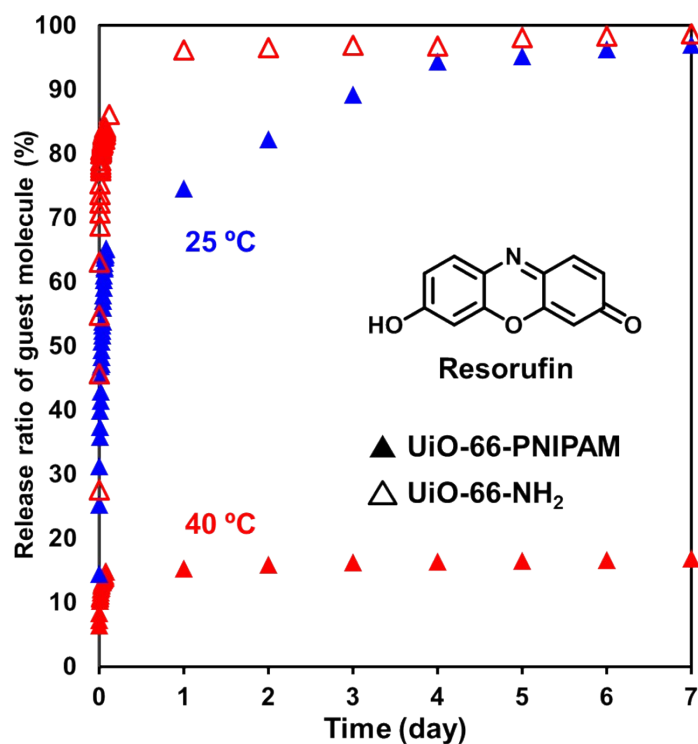

**Fig. S7** Release behavior of resorufin from pristine **UiO-66-NH<sub>2</sub>** (open triangle, 40 °C) and **UiO-66-PNIPAM** (filled triangle, 25 °C and 40 °C). The release ratio was determined from the absorbance at 572 nm.

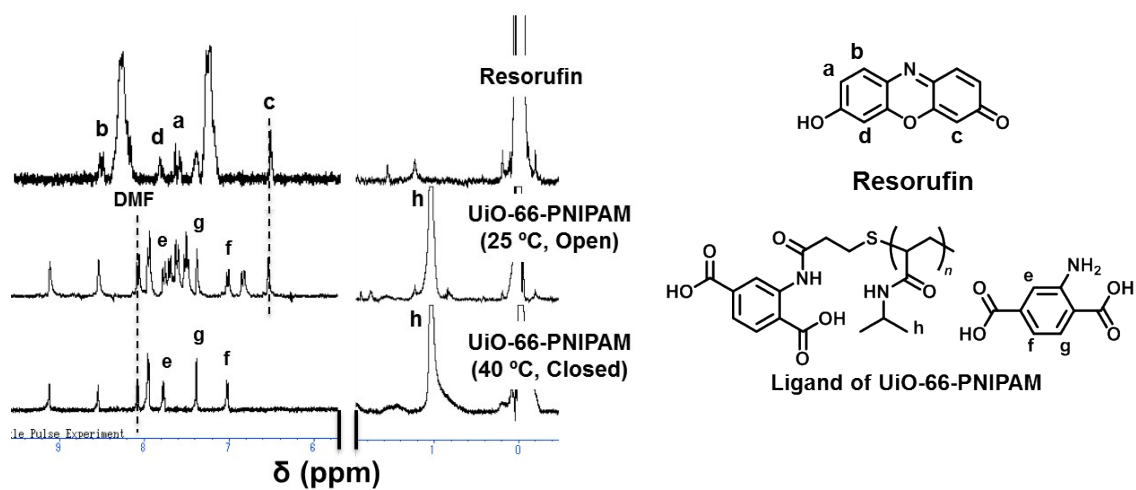

**Fig. S8** <sup>1</sup>H NMR spectra of digesting solution of **UiO-66-PNIPAM** treated with resorufin water solution (50mM) at 40 °C.

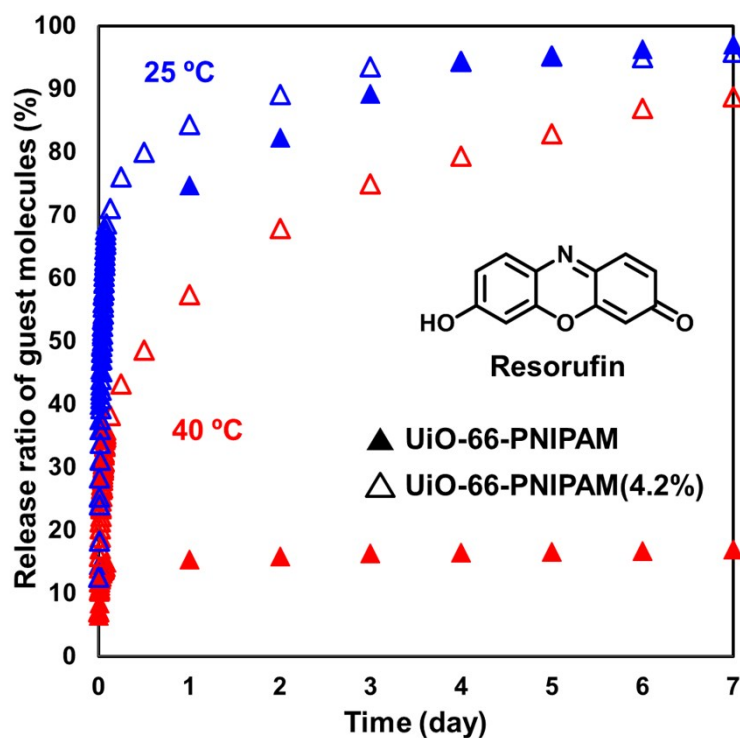

**Fig. S9** Release behavior of resorufin from **UiO-66-PNIPAM** (filled triangle) and **UiO-66-PNIPAM(4.2)** (open triangle) at 25 °C and 40 °C. The release ratio was determined from the absorbance at 572 nm.

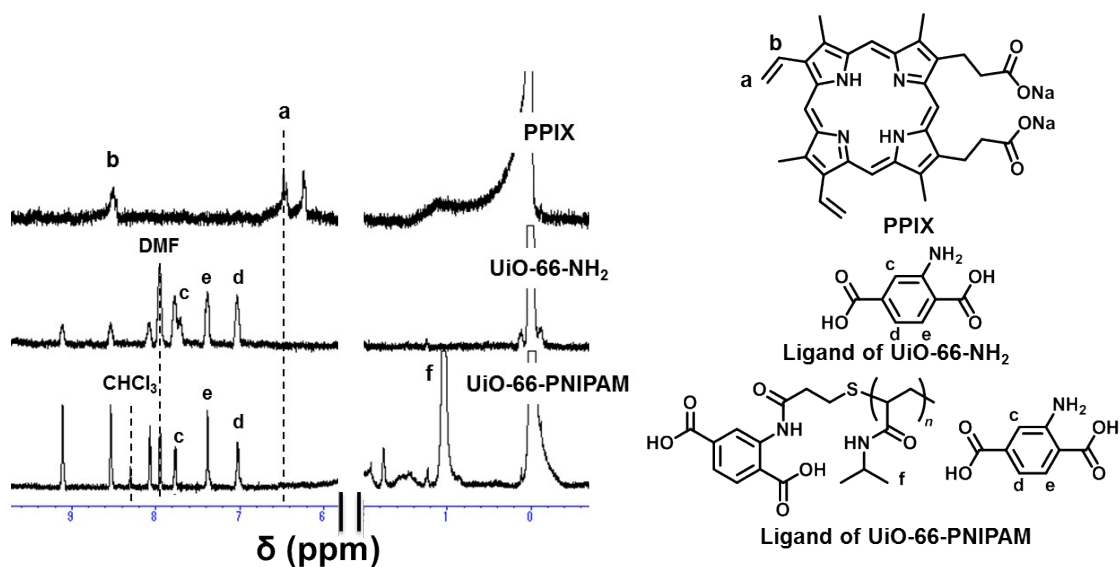

**Fig. S10** <sup>1</sup>H NMR spectra of digesting solution of **UiO-66-NH<sub>2</sub>** and **UiO-66-PNIPAM** treated with **PPIX** water solution (50mM).



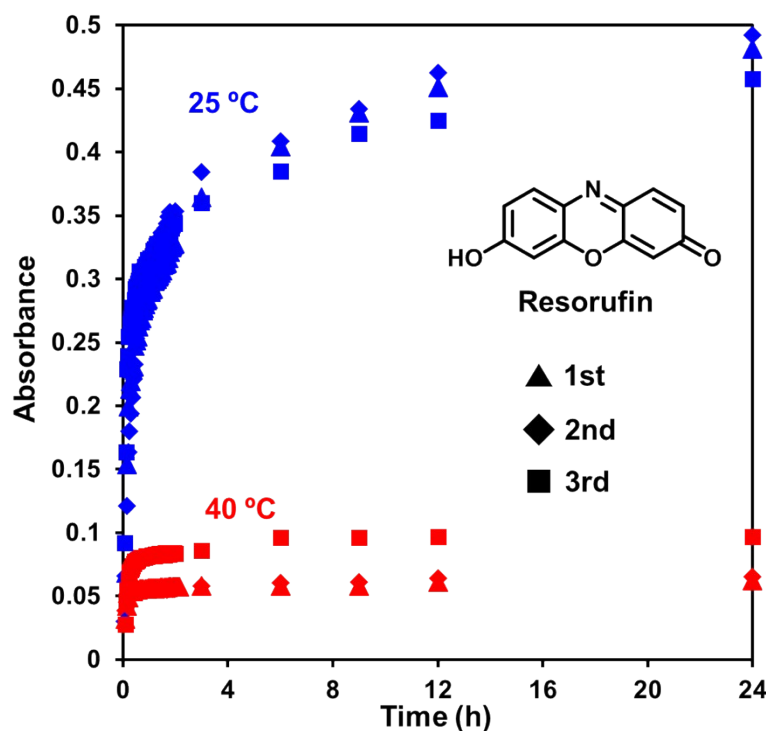

**Fig. S11** Release behavior of resorufin from reloaded **UiO-66-PNIPAM** until 3 times at 25 °C and 40 °C. The release ratio was determined from the absorbance at 572 nm

## Acknowledgement

The authors acknowledge the financial support from JSPS Grant-in-Aid for Scientific Research (B) (26288054), partially from JSPS Grant-in-Aid for Scientific Research (Fusion material) (25107701), and Grant-in-Aid for JSPS Fellows (13J03830). The authors greatly appreciate Prof. Dr. M. Kato, Prof. Dr. H.-C. Chang, and Prof. Dr. A. Kobayashi for Powder X-ray diffraction measurement. The SEM and TEM observations and DLS measurement were carried out at the OPEN FACILITY, Hokkaido University Sousei Hall.
